# Supplementary material for: 6-Paradol Alleviates Testosterone-Induced Benign Prostatic Hyperplasia in Rats by Inhibiting AKT/mTOR Axis
Source: MDPI journal article supplement (doi:10.3390/plants11192602), 2022-10-03
Supplement: s1 [file s1]

# Supplementary Materials

Dr.Hossam

Sample : P

CDCL<sub>3</sub>

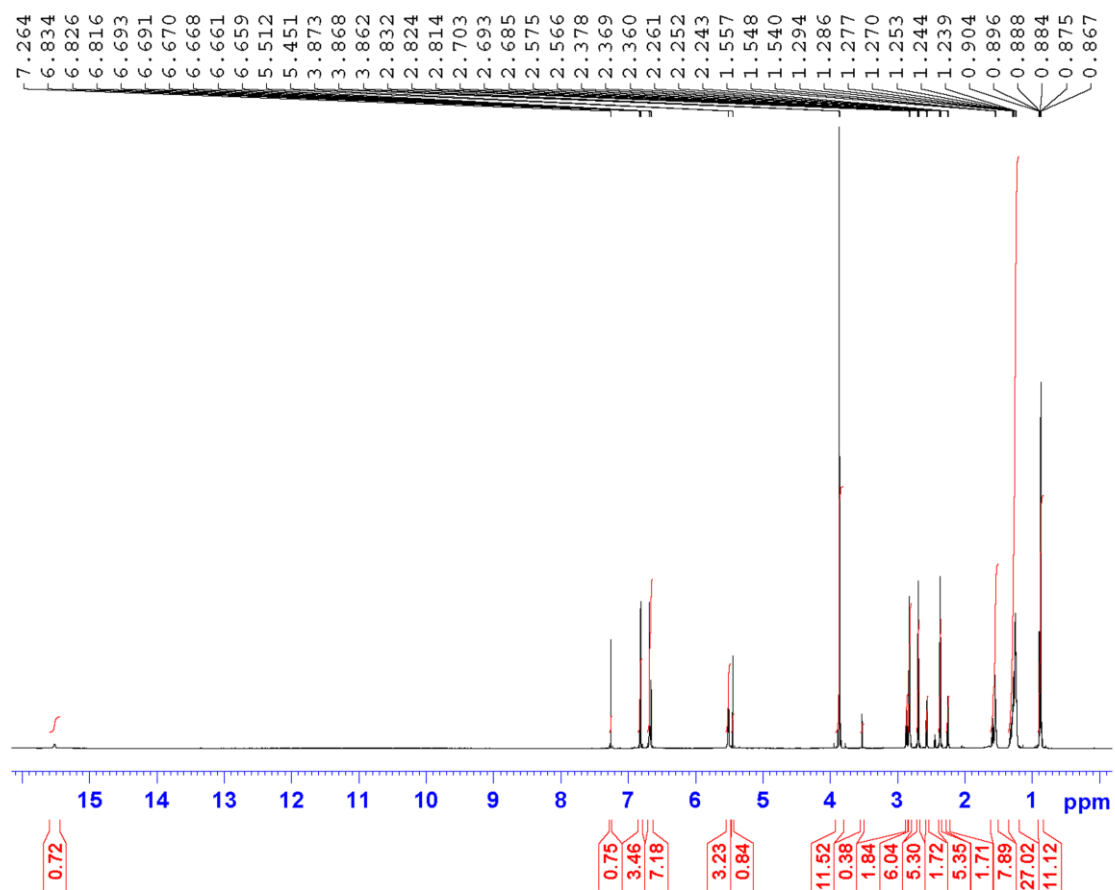

Figure S1. <sup>1</sup>H NMR spectra of 6-paradol.

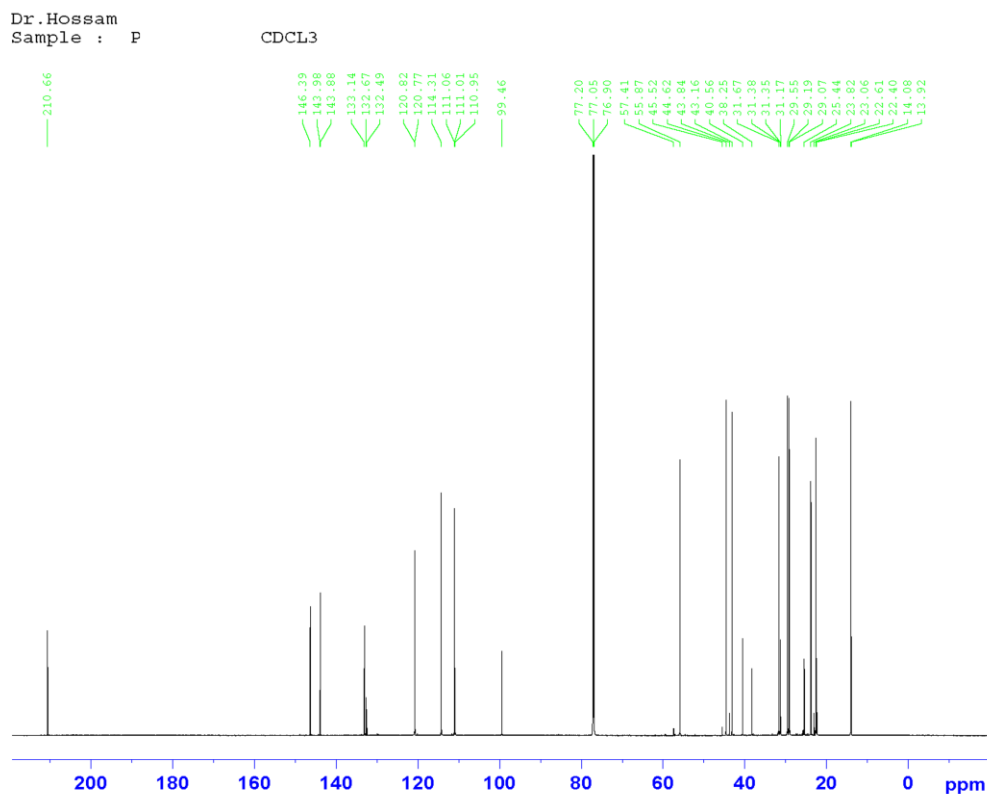

**Figure S2.** <sup>13</sup>CNMR spectra of 6-paradol.

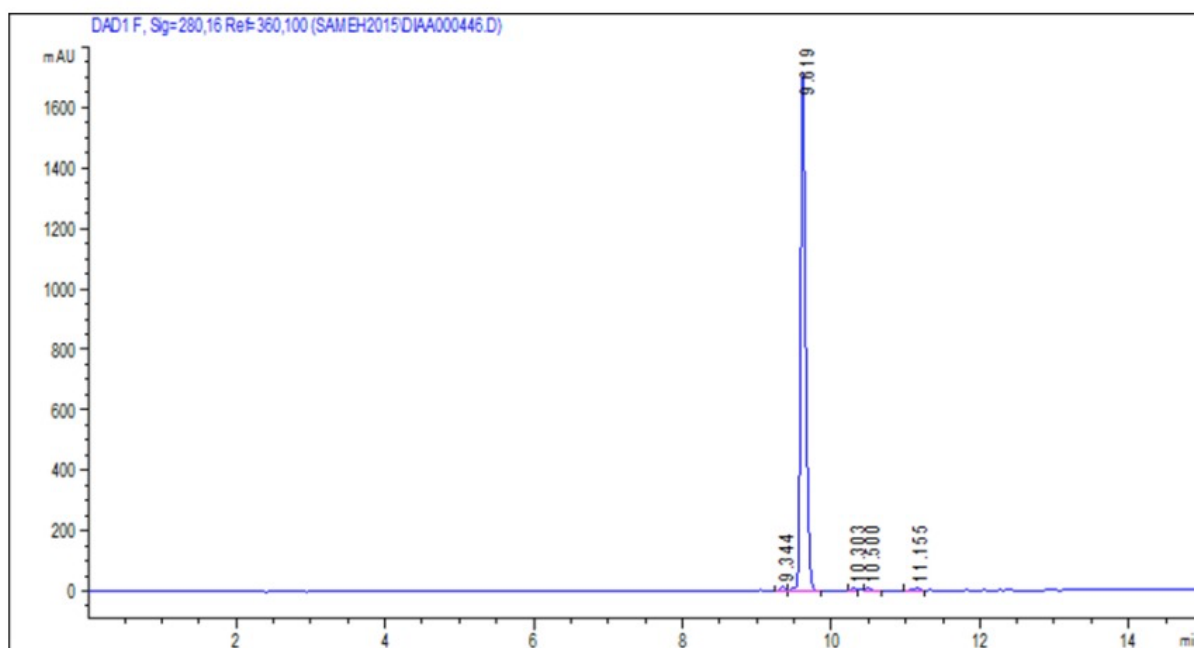

**Figure S3.** 6-Paradol HPLC chromatogram

HPLC was carried out on Agilent 1200 infinity instrument equipped with automatic injector and DAD detector. Paradol was chromatographed gradiently using a mobile phase A (acetonitrile) and B (0.1% TFA). The gradient elution program was: 35 % A (0-2 min), 35 - 60 % A (2-10 min), 60 - 100 % A (10-12 min) and 100 - 35 % A (12-16 min). The flow rate was 1.0 mL/min and the peaks were monitored 280 nm, respectively. Purity of paradol was 97% at these conditions.
